# Supplementary material for: Genotypic Categorization of Loeys-Dietz Syndrome Based on 24 Novel Families and Literature Data
Source: MDPI journal article supplement (doi:10.3390/genes10100764), 2019-09-28
Supplement: s1 [file s1]

Supplementary Table S2: Clinical and molecular features of LDS patients described in this cohort

[illegible]
