# Supplementary material for: Genotypic Categorization of Loeys-Dietz Syndrome Based on 24 Novel Families and Literature Data
Source: MDPI journal article supplement (doi:10.3390/genes10100764), 2019-09-28
Supplement: s1 [file s1]

**Supplementary Table 1.** Primers used to amplify each gene/exon.

| <i>TGFBR1</i> (NM_004612.4) |                |                         |
|-----------------------------|----------------|-------------------------|
| Exon 1                      | <b>forward</b> | cctccgagcagttacaaagg    |
|                             | <b>reverse</b> | gcgcatgtttgagaaagag     |
| Exon 2                      | <b>forward</b> | gagcaacaacagtgcatagaa   |
|                             | <b>reverse</b> | tgcttctaacggaatgagc     |
| Exon 3                      | <b>forward</b> | gggttgccacctacagtgtt    |
|                             | <b>reverse</b> | tcacattctagcaagttggctta |
| Exon 4                      | <b>forward</b> | agtgcctatcatgatgttgaa   |
|                             | <b>reverse</b> | tgtctcatctactttgatgatgg |
| Exon 5                      | <b>forward</b> | tgcatgtgtgactcaggattg   |
|                             | <b>reverse</b> | gccagcctccaccttctat     |
| Exon 6                      | <b>forward</b> | ttgggttgggagaagagacttt  |
|                             | <b>reverse</b> | gagcaggcaagacatgaga     |
| Exon 7                      | <b>forward</b> | tggcagtaaggggatgattt    |
|                             | <b>reverse</b> | ctcgtgacatcctgtttca     |
| Exon 8                      | <b>forward</b> | gtcatttcaaataaggctttat  |
|                             | <b>reverse</b> | ttactaagcagaagcagtta    |
| Exon 9                      | <b>forward</b> | cagaccaatggaaaatgggtg   |
|                             | <b>reverse</b> | tgcaaaaggaagcaatatcc    |

| <i>TGFBR2</i> (NM_003242.5) |                |                       |
|-----------------------------|----------------|-----------------------|
| Exon 1                      | <b>forward</b> | catgattggcagctacgaga  |
|                             | <b>reverse</b> | cacaatccctgcagctacg   |
| Exon 2                      | <b>forward</b> | aacatcttcaggaattcattg |
|                             | <b>reverse</b> | aaagggaaatggaacaggtg  |
| Exon 3                      | <b>forward</b> | tccagattgcctttctgtctg |
|                             | <b>reverse</b> | aatccaccacaggaggaatg  |
| Exon 4                      | <b>forward</b> | catgaacccacttctgaca   |
|                             | <b>reverse</b> | gccagtattgttcccaac    |
| Exon 4                      | <b>forward</b> | tgctcttgaagacagagaa   |
|                             | <b>reverse</b> | ggatcaagaggtagggtgagg |
| Exon 5                      | <b>forward</b> | gggccaccatcagctatatt  |
|                             | <b>reverse</b> | atgctgaagcaacacatga   |
| Exon 6                      | <b>forward</b> | ctgcacatgccatttcat    |
|                             | <b>reverse</b> | tccagaattctctgccacct  |
| Exon 7                      | <b>forward</b> | gacctgcttgactcacta    |
|                             | <b>reverse</b> | tctgcttatccccacagctt  |

| <i>SMAD3</i> (NM_005902.4) |         |                       |
|----------------------------|---------|-----------------------|
| Exon 1                     | forward | ggggggttgactttccttc   |
|                            | reverse | cactccctccctctctctcc  |
| Exons 2-3                  | forward | tggatctgggagaaatgagg  |
|                            | reverse | agattggggccacggact    |
| Exon 4                     | forward | tgggtgtgcatgtgtgatgtc |
|                            | reverse | gaagaggaagggatggaagg  |
| Exon 5                     | forward | ggctaccctccttgatatg   |
|                            | reverse | ggggagagccttaccttcag  |
| Exon 6                     | forward | ggggaaatggtttccagag   |
|                            | reverse | tcagaggctgtgttcagg    |
| Exon 7                     | forward | ctccttgcgagcctcag     |
|                            | reverse | aagggtgactctctccagca  |
| Exon 8                     | forward | agtgtggagtgtgtggcaaa  |
|                            | reverse | gctggcctagctcatctctg  |
| Exon 9                     | forward | gacttgtgaacccctgga    |
|                            | reverse | aacatccacctctgggtttg  |

| <i>TGFB2</i> (NM_001135599.3) |         |                           |
|-------------------------------|---------|---------------------------|
| Exon 1                        | forward | agggtccctctgccgtcc        |
|                               | reverse | ccgggagctgctgcggttt       |
| Exon 2                        | forward | atccctggccccaggtagc       |
|                               | reverse | tcgctcaggtacaaggctgcat    |
| Exon 3                        | forward | tccaccagtctgtcagcctcaa    |
|                               | reverse | tcgggtgtgatggtgcactcc     |
| Exons 4-5                     | forward | ttcatggcaaatagcctggtgtgt  |
|                               | reverse | tagaccctccctccccacct      |
| Exon 6                        | forward | agccctggctttgacaccga      |
|                               | reverse | tctggccttagcagtgagttccac  |
| Exon 7                        | forward | tggtttggggtgaggtggtgg     |
|                               | reverse | tgtgatggtgaagacagcacgaggt |
| Exon 8                        | forward | tgctactcagtgtgtgactgct    |
|                               | reverse | aggcgcgggataggaacggt      |
